# Supplementary material for: Findings from computed tomography examinations of Viking skulls
Source: Research Square preprint supplement (doi:10.21203/rs.3.rs-5187695/v1), 2024-10-23
Supplement: Supplementary file [file 1ef4cf116bc7b0392b306c12.pdf]

**Supplementary Table 1 Findings of the computed tomography images: samples, description and raw data.**  
**The identities, biological markers, and pathological conditions of the study cohort**

| Individual number<br>(age in years)<br>gender | Maxilla/<br>mandibula | Lost teeth<br>(n)   | Periodontal<br>disease (tooth<br>number) | Periapical<br>inflammatory<br>disease (tooth<br>number and root<br>affected)                                                                                                                                                                                                                                              | TMJ<br>abnormalities                                                                                                                                                                                           | Other findings                                                                                                                                                                                                                                                                        |
|-----------------------------------------------|-----------------------|---------------------|------------------------------------------|---------------------------------------------------------------------------------------------------------------------------------------------------------------------------------------------------------------------------------------------------------------------------------------------------------------------------|----------------------------------------------------------------------------------------------------------------------------------------------------------------------------------------------------------------|---------------------------------------------------------------------------------------------------------------------------------------------------------------------------------------------------------------------------------------------------------------------------------------|
| 12 (45-60) F                                  | Both                  | AM: 5<br><br>PM: 17 | FI: 16b                                  | PAL: 16m,p,d , 15<br>(diffuse border<br>towards s.<br>maxillaris inferior<br>wall), 25 (diffuse<br>lesion), 26mb,dbp.<br><br>PAL with marginal<br>communication:<br>26db,p (towards<br>inferior wall of<br>maxillary sinus), 33<br>(broad destruction<br>zone), 35, 36m,d<br>(cyst-like).<br><br>Apical sclerosis:<br>46. | Right: anterior<br>osteophyte<br>formation of the<br>condyle.                                                                                                                                                  | Regio 41-31:<br>marginal bone<br>defect.<br><br>Bilaterally: tori<br>palatini.<br><br>Right: mastoid<br>process sclerotized.                                                                                                                                                          |
| 20 (25-35) F                                  | Both                  | AM: 0<br><br>PM: 2  | VBD: 28m, b, 37l,<br>38l<br>FI: 46l      | LL: 46d.                                                                                                                                                                                                                                                                                                                  |                                                                                                                                                                                                                |                                                                                                                                                                                                                                                                                       |
| 62 (35-50) M                                  | Both                  | AM: 8<br><br>PM: 9  | FI: 18b, 46b                             | PAL: 45, 36m,d,<br>37m,d.                                                                                                                                                                                                                                                                                                 | Right: medial<br>flattening of the<br>condyle. Flattening<br>of the articulating<br>eminence.<br><br>Left: inferior of the<br>condyle joint<br>surface, medially<br>and laterally, small<br>destruction zones. | 15 buccal bone<br>destruction, 28<br>apical bone<br>destruction with<br>communication to<br>the maxillary sinus.<br><br>48 bone destruction<br>with signs of<br>healing.<br><br>Maxillary sinus:<br>left, broadened<br>peripheral cortex in<br>concordance with<br>chronic sinusitis. |

|               |      |                                                                                                                             |                                                               |                                                                                                                                                                                                              |                                                                                                                    |                                                                                                                                                                                                                               |
|---------------|------|-----------------------------------------------------------------------------------------------------------------------------|---------------------------------------------------------------|--------------------------------------------------------------------------------------------------------------------------------------------------------------------------------------------------------------|--------------------------------------------------------------------------------------------------------------------|-------------------------------------------------------------------------------------------------------------------------------------------------------------------------------------------------------------------------------|
| 64 (>50) F    | Max  | Edentulous maxillae<br>AM: 32<br>PM: 0<br><br>Regions 13 and 23 partially healed alveoli with loss of buccal cortical bone. |                                                               |                                                                                                                                                                                                              |                                                                                                                    | Maxillary alveolar crest resorbed.                                                                                                                                                                                            |
| 98 (40-45) M  | Both | AM: 0<br><br>PM: 2                                                                                                          | FI: 27b                                                       | PAL: 13, 23, 46m,d                                                                                                                                                                                           | Right: PM fracture<br><br>Left: PM fracture                                                                        | Regio 14-12 periosteal bone deposition buccally.                                                                                                                                                                              |
| 102 (34-45) M | Max  | AM: 0<br><br>PM: 2                                                                                                          | VBD: 18b, 23m, 24d, 28m<br>FI: 18b, 27 d, b, p                | PAL with destruction of buccal cortical bone: 16d,p,m, 26p                                                                                                                                                   |                                                                                                                    |                                                                                                                                                                                                                               |
| 114 (25-30) F | Both | AM: 0<br><br>PM: 10                                                                                                         | VBD: 36m                                                      |                                                                                                                                                                                                              |                                                                                                                    |                                                                                                                                                                                                                               |
| 126 (45-60) M | Both | AM: 6<br><br><br><br><br><br><br>PM: 9                                                                                      | VBD: 47d, 41mdbl, 37d<br><br><br><br><br><br><br>FI: 47b, 37b | PAL: 14b, p, 12, 11, 22, 23, 48, 46m,d (with destruction of buccal cortical bone), 41, 36m,d<br><br><br>Regio 31-33: teeth lost PM with residual PAL.<br><br><br>Regio 17, 16: teeth lost AM. Residual cyst. | Bilateral: condylar lateral loss of cortical boarder                                                               | Caries: 14p(root).<br><br><br>Regio 27-28 resorbed alveolar crest.<br><br><br>Maxillary sinus right: broadened peripheral cortex in concordance with chronic sinusitis.<br><br><br>Frontal sinus: broadened peripheral cortex |
| 144 (24-26) F | Both | AM: 0<br><br>PM: 4                                                                                                          |                                                               | PAL: 36m,d with marginal communication.                                                                                                                                                                      | Left: condylar lateral flattening.                                                                                 | Caries: 26o, 36m,o,d,b,l.                                                                                                                                                                                                     |
| 181 (45-60) M | Both | Edentulous maxillae<br><br>AM: 30<br>PM: 2                                                                                  |                                                               | PAL: 32 with buccal perforation of cortical bone.                                                                                                                                                            | Left: condylar lateral loss of cortical border.<br><br>Right: condylar lateral and medial loss of cortical border. | Generally resorbed alveolar crest.<br><br>Regions with destruction of the buccal/lingual bone: 21, 23, 47, 45, 43, 33, 37.                                                                                                    |

|               |      |                 |                               |                                                                                                                            |                                                                                                                                           |                                                                                                                          |
|---------------|------|-----------------|-------------------------------|----------------------------------------------------------------------------------------------------------------------------|-------------------------------------------------------------------------------------------------------------------------------------------|--------------------------------------------------------------------------------------------------------------------------|
|               |      |                 |                               |                                                                                                                            |                                                                                                                                           | Maxillary sinus bilaterally: broadened peripheral cortex in concordance with chronic sinusitis.                          |
| 204 (30-50) M | Max  | AM: 0<br>PM: 1  |                               |                                                                                                                            |                                                                                                                                           | 24 three roots.<br>Caries: 25d(3).                                                                                       |
| 218 (25-35) M | Both | AM: 0<br>PM: 5  | VBD: 17d, 26m, b, 36d         |                                                                                                                            | Left: general destruction of condyle.                                                                                                     | Regio 24-25 loss of buccal bone cortex.<br><br>Sclerotization in the buccal region of the ramus mandibulae (right side). |
| 233 (45-60) M | Max  | AM: 3<br>PM: 1  | FI: 18b, 27b, d, 28b, d       | PRL: 16mb,db, 26db.<br><br>PAL: 16p(with buccal cortex destruction), 21, 22, 23, 24b,p, 26p (with cortex destruction), mb. |                                                                                                                                           | Regio 16, 25: retained roots.<br><br>Regio 14: destruction of buccal cortical bone.                                      |
| 297 (20-25) M | Both | AM: 0<br>PM: 0  | VBD: 26m, 27d, 47d<br>FI: 27d | PAL: 26m,b                                                                                                                 |                                                                                                                                           | Caries: 46 occlusal.<br><br>48 rotated mesially.                                                                         |
| 299 (25-35) F | Both | AM: 0<br>PM: 22 |                               | PAL: 18m, d with destruction of maxillary sinus inferior border.                                                           | Right: loss of lateral cortical border of the condyle<br><br>Left: Lateral bone destruction of the condyle with periosteal bone reaction. | Regio 23-25: PM buccal alveolar bone fracture.<br><br>AM bone destruction towards the left external acoustic meatus.     |

### Abbreviations

TMJ= Temporomandibular joint

F= Female

M=Male

AM= Ante mortem

PM= Post mortem

FI= Furcation involvement

PAL= Periapical lesion

VBD= Vertical bone defect

LL=Lateral lesion

PRL=Periradicular lesion

RC= Right condyle

LC= Left condyle

m= mesial

d= distal

p= palatal

b= buccal

l=lingual
